# Supplementary material for: Vitamin D Status Assessment: Lack of Correlation between Serum and Hair 25-Hydroxycholecalciferol Levels in Healthy Young Adults
Source: MDPI journal article supplement (doi:10.3390/diagnostics12051229), 2022-05-14
Supplement: s1 [file s1]

# Vitamin D Status Assessment: Lack of Correlation between Serum and Hair 25-hydroxycholecalciferol Levels in Healthy Young Adults

Zsolt Gáll <sup>1\*</sup>, Brigitta Csukor <sup>2</sup>, Melinda Urkon <sup>1</sup>, Lenard Farczádi <sup>3</sup>, and Melinda Kolcsár <sup>1</sup>

<sup>1</sup> Department of Pharmacology and Clinical Pharmacy, George Emil Palade University of Medicine, Pharmacy, Science, and Technology of Targu Mures, 540142 Targu Mures, Romania; urkonmelinda1@gmail.com (M.U.); melinda.kolcsar@umfst.ro (M.K.)

<sup>2</sup> Faculty of Pharmacy, George Emil Palade University of Medicine, Pharmacy, Science, and Technology of Targu Mures, 540142 Targu Mures, Romania; csukorbrigitta@gmail.com

<sup>3</sup> Chromatography and Mass Spectrometry Laboratory, Center for Advanced Medical and Pharmaceutical Research, George Emil Palade University of Medicine, Pharmacy, Science, and Technology of Targu Mures, 540142 Targu Mures, Romania; [lenard.farczadi@umfst.ro](mailto:lenard.farczadi@umfst.ro)

**Table S1.** MRM transitions and parameters for vitamin D analysis

| Analyte       | Retention Time (min) | MRM transition | Collision energy (eV) | Declustering Potential |
|---------------|----------------------|----------------|-----------------------|------------------------|
| 25(OH)D3      | 5.40                 | 558.4 – 298.1  | 20                    | 100                    |
| d6-25(OH)D3   | 5.40                 | 564.4 – 298.1  | 20                    | 100                    |
| vitamin D3    | 8.95                 | 560.4 – 298.1  | 18                    | 100                    |
| d3-vitamin D3 | 8.95                 | 563.4 – 301.1  | 18                    | 100                    |
| 1,25(OH)2D3   | 4.95                 | 574.1 – 314.1  | 15                    | 50                     |

**Table S2.** Multiple regression analysis of the serum 25(OH)D3 levels at the second sampling timepoint (t2).

| Variable           | Estimate | Standard error | t      | P value |
|--------------------|----------|----------------|--------|---------|
| Intercept          | 32.56    | 16.92          | 1.924  | 0.0687  |
| Gender             | -2.347   | 3.571          | 0.6573 | 0.5185  |
| Takes supplements? | 0.4874   | 2.432          | 0.2004 | 0.8432  |
| Exposed to sun?    | 5.721    | 2.494          | 2.294  | 0.0328  |
| BMI                | -0.8865  | 0.7123         | 1.245  | 0.2277  |
| Physical activity  | 3.857    | 2.776          | 1.390  | 0.1799  |

**Table S3.** Multiple regression analysis of the serum 25(OH)D3 levels at the first sampling timepoint (t1).

| Variable           | Estimate | Standard error | t      | P value |
|--------------------|----------|----------------|--------|---------|
| Intercept          | 14.48    | 17.73          | 0.8167 | 0.4237  |
| Gender             | 0.4714   | 3.659          | 0.1288 | 0.8988  |
| Takes supplements? | 5.382    | 2.558          | 2.104  | 0.0482  |
| Exposed to sun?    | 4.439    | 2.527          | 1.757  | 0.0942  |
| BMI                | -0.3728  | 0.7551         | 0.4938 | 0.6268  |
| Physical activity  | 2.900    | 2.811          | 1.032  | 0.3145  |
